# Supplementary material
Source: Springer Nature journal article supplement (https://www.springermedizin.de/resource/supplementary/13049_2012_577_MOESM3_ESM.pdf/9666860)

(DCW)

10

8

6

4

2

0

C

5

3&4

2

1

GOS score

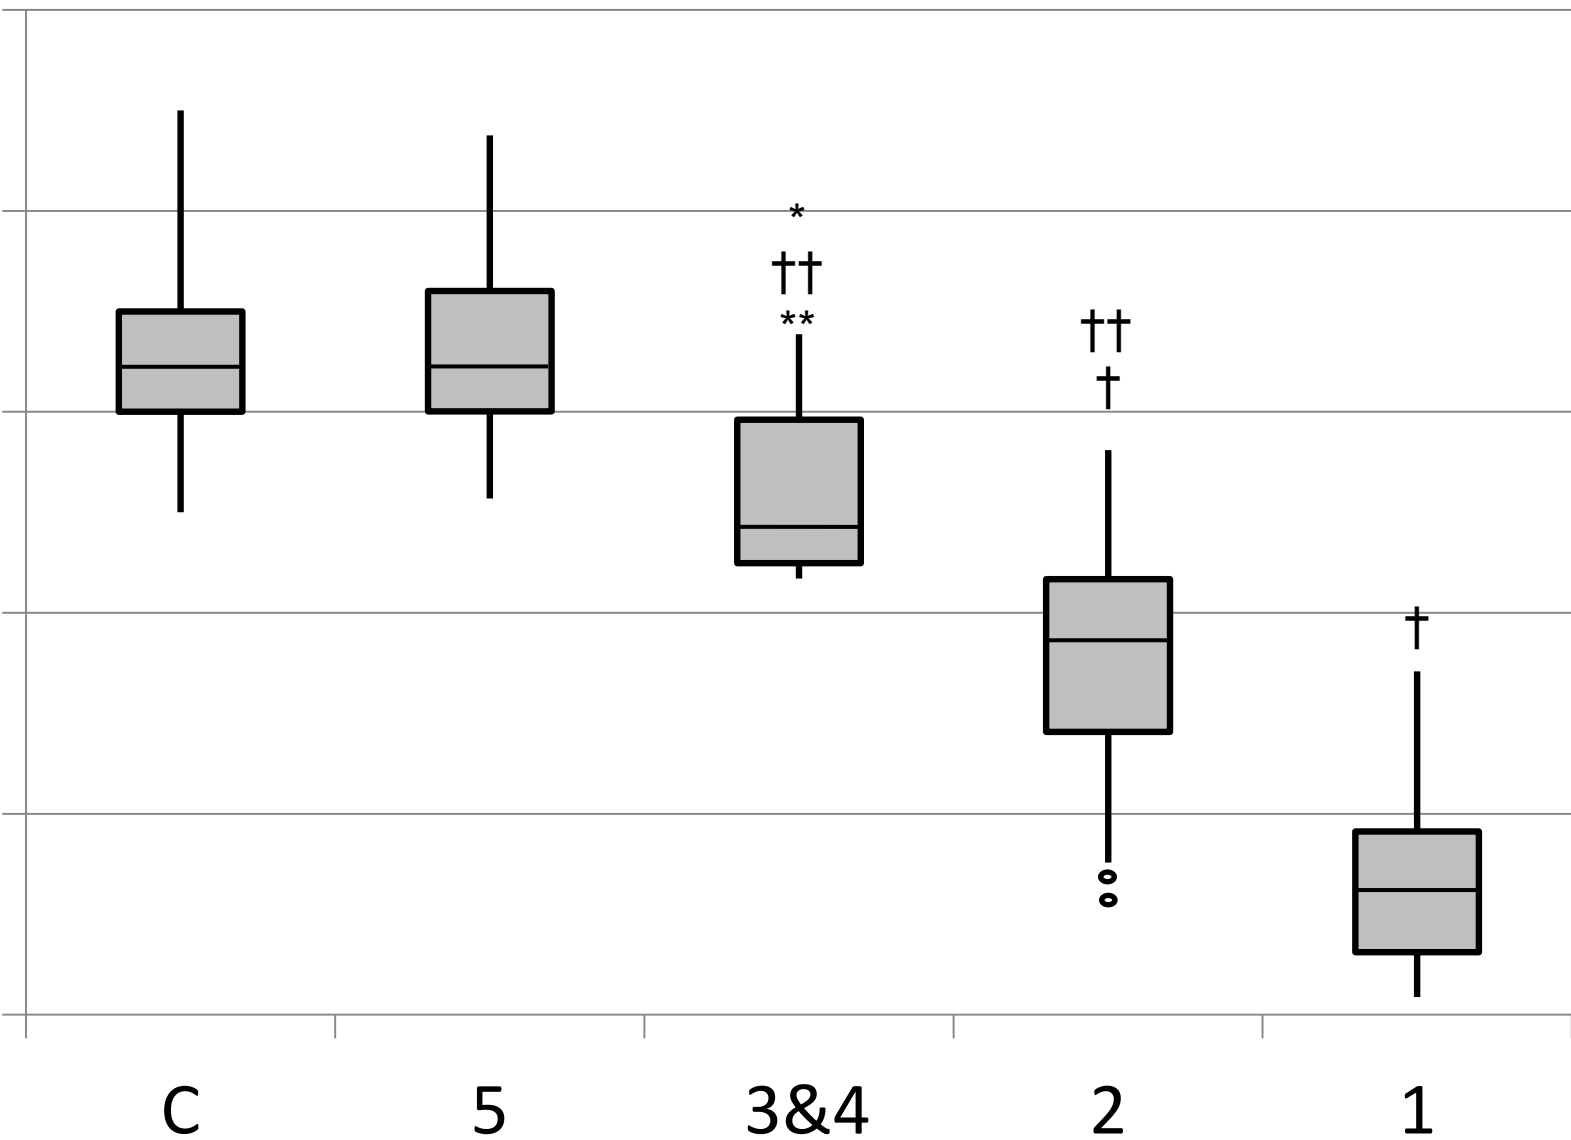

Supplement: MOESM3 [file 9666860]
